# Supplementary material for: New amine-functionalized cobalt cluster-based frameworks with open metal sites and suitable pore sizes: multipoint interactions enhanced CO2 sorption
Source: Royal Society of Chemistry journal article supplement (doi:10.1039/c3dt51258d), 2013-01-01
Supplement: c3dt51258d.pdf [file c3dt51258d.pdf]

## Supporting Information

### New amine-functionalized cobalt cluster-based frameworks with open metal sites and suitable pore sizes: multipoint interactions enhanced CO<sub>2</sub> sorption

Bo Liu<sup>†</sup>, Ruili Zhao<sup>†</sup>, Kefen Yue\*, Jingtao Shi, Yang Yu, and Yaoyu Wang

Key Laboratory of Synthetic and Natural Functional Molecule Chemistry of the Ministry of Education, Shaanxi Key Laboratory of Physico-Inorganic Chemistry, College of Chemistry & Materials Science, Northwest University, Xi'an 710069, P. R. China.

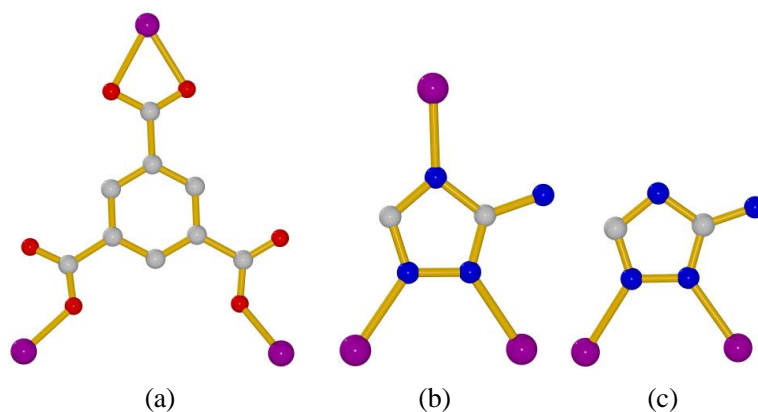

**Figure S1.** The coordination modes of the  $\text{btc}^{3-}$  (a),  $\text{atz}^-$  (b) and  $\text{Hatz}$  (c) in **1**.

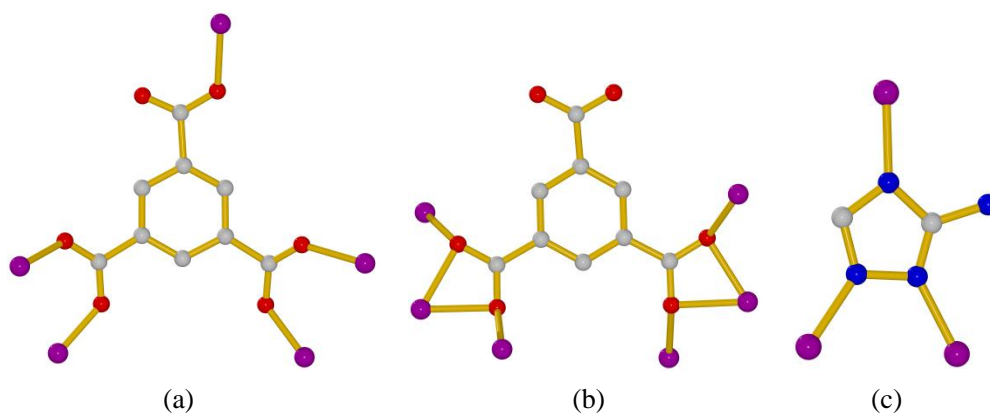

**Figure S2.** The coordination modes of the  $\text{btc}^{3-}$  (a),  $\text{Hbtc}^{2-}$  (b) and  $\text{atz}^-$  (c) in **2**.

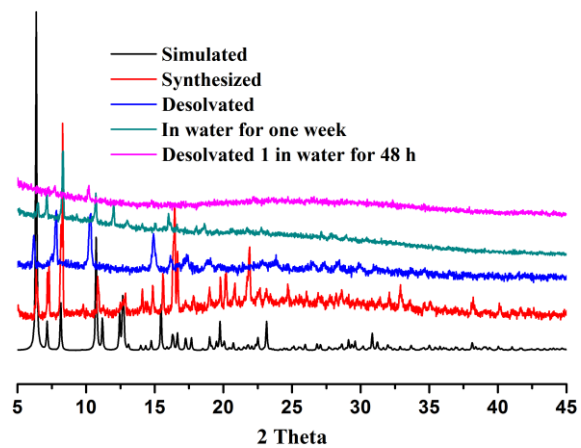

(a)

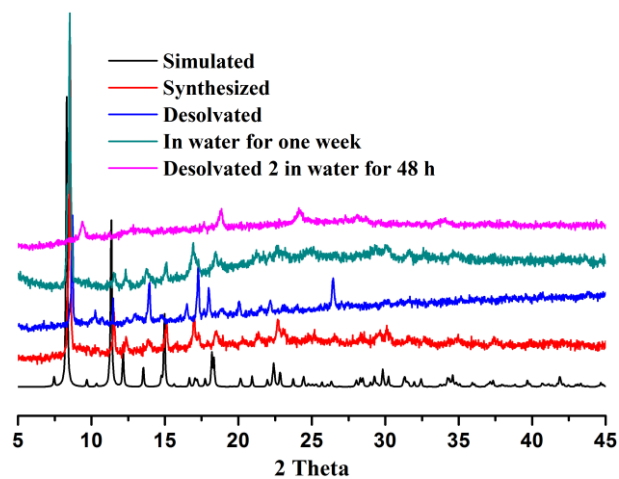

(b)

**Figure S3.** PXRD patterns of **1** (a) and **2** (b) after different treatments.

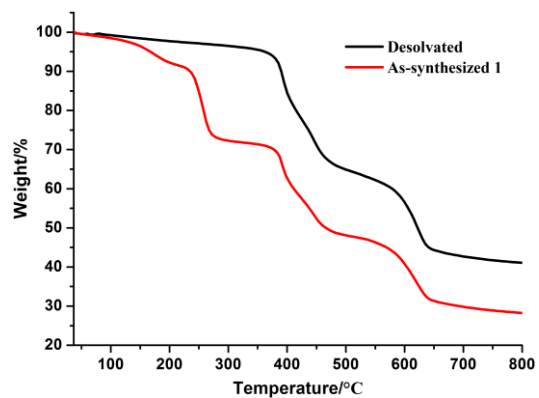

(a)

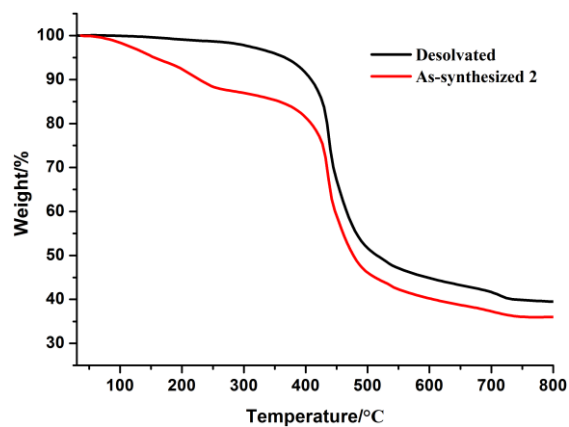

(b)

**Figure S4.** TGA curves of **1** (a), **2** (b), desolvated **1** and **2**.

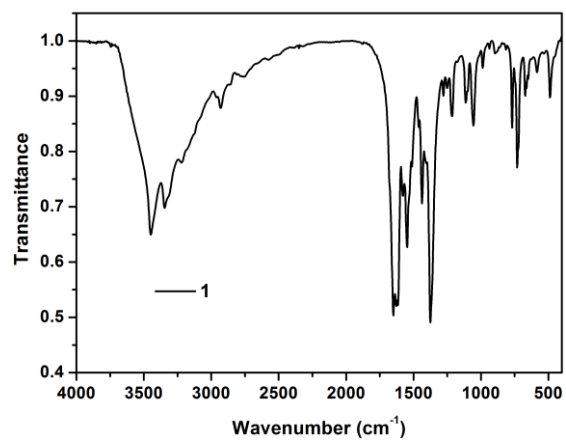

(a)

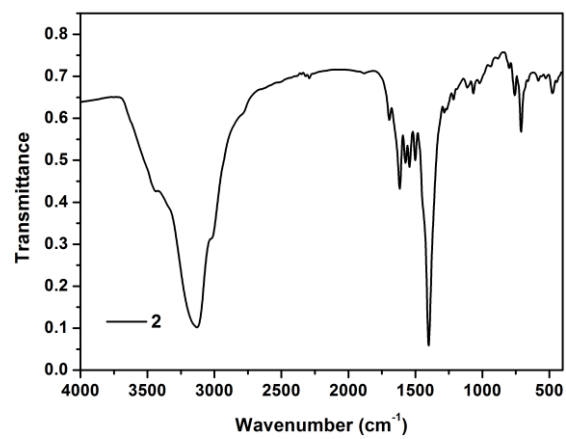

(b)

**Figure S5.** IR spectra of **1**(a) and **2** (b).

### Calculation of sorption heat for CO<sub>2</sub> uptake using Virial 2 model

$$\ln P = \ln N + 1/T \sum_{i=0}^m aiN^i + \sum_{i=0}^n biN^i \quad Q_{st} = -R \sum_{i=0}^m aiN^i$$

The above equation was applied to fit the combined CO<sub>2</sub> isotherm data for desolvated **1** and **2** at 273 and 295 K, where  $P$  is the pressure,  $N$  is the adsorbed amount,  $T$  is the temperature,  $ai$  and  $bi$  are virial coefficients, and  $m$  and  $n$  are the number of coefficients used to describe the isotherms.  $Q_{st}$  is the coverage-dependent enthalpy of adsorption and  $R$  is the universal gas constant.

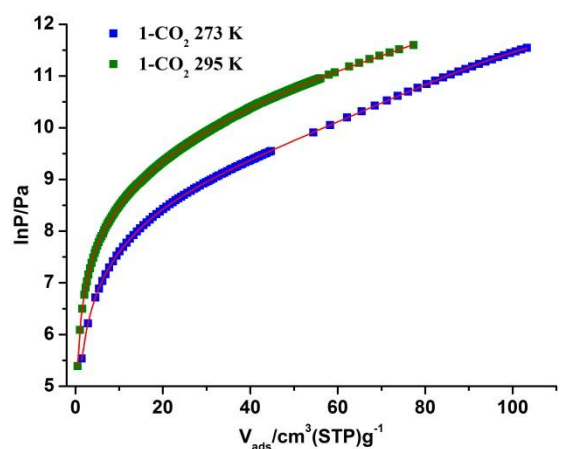

(a)

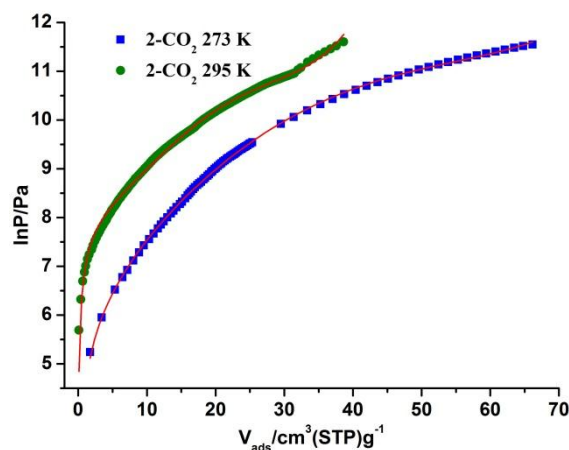

(b)

**Figure S6.** (a) CO<sub>2</sub> adsorption isotherms for desolvated **1** with fitting by Virial 2 model. Fitting results:  $a_0 = -3595.44147$ ,  $a_1 = 51.05360$ ,  $a_2 = 7.89771$ ,  $a_3 = 11.48727$ ,  $a_4 = -8.60000 \times 10^{-6}$ ,  $b_0 = 18.28262$ ,  $b_1 = -0.16620$ ,  $b_2 = -0.02931$ ,  $b_3 = -0.04207$ .  $\chi^2 = 0.00003$ ,  $R^2 = 0.99997$ . (b) CO<sub>2</sub> adsorption isotherms for desolvated **2** with fitting by Virial 2 model. Fitting results:  $a_0 = -3678.84498$ ,  $a_1 = 53.10015$ ,  $a_2 = 8.09084$ ,  $a_3 = 11.47996$ ,  $a_4 = 1.03215 \times 10^{-4}$ ,  $b_0 = 17.9306$ ,  $b_1 = -0.14128$ ,  $b_2 = -0.02860$ ,  $b_3 = -0.04210$ .  $\chi^2 = 0.00340$ ,  $R^2 = 0.99718$ .
